# Supplementary material
Source: PubMed Central journal article supplement (PMC5994969)

Heterozygosity

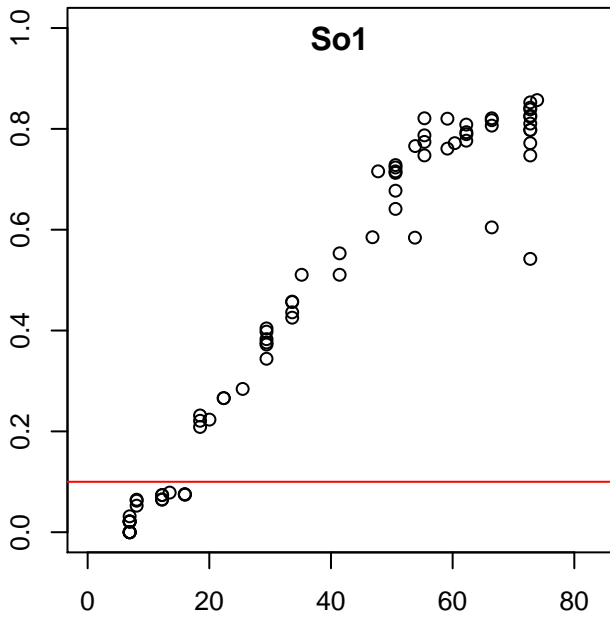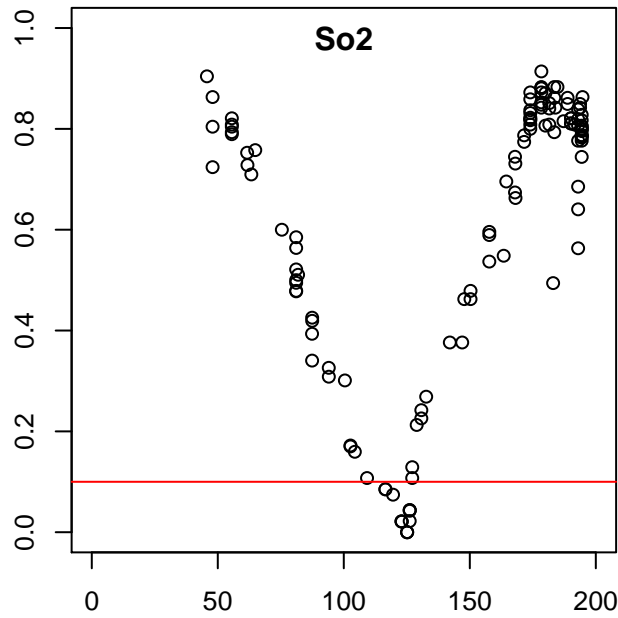

Heterozygosity

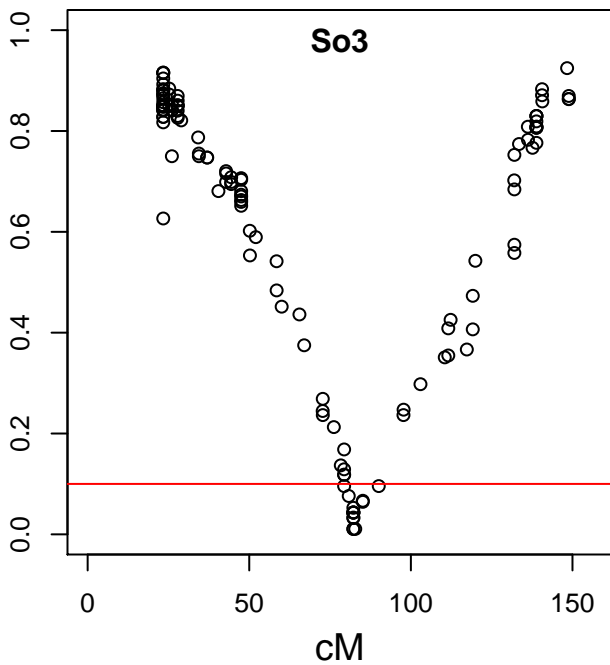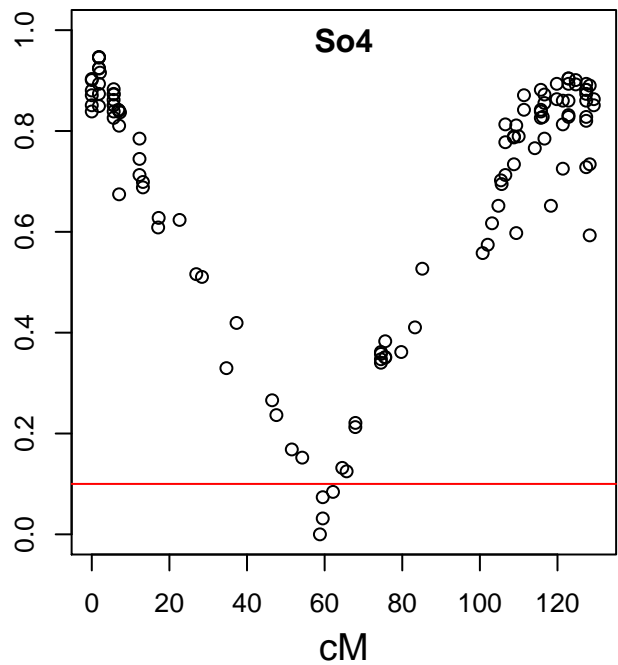

Heterozygosity

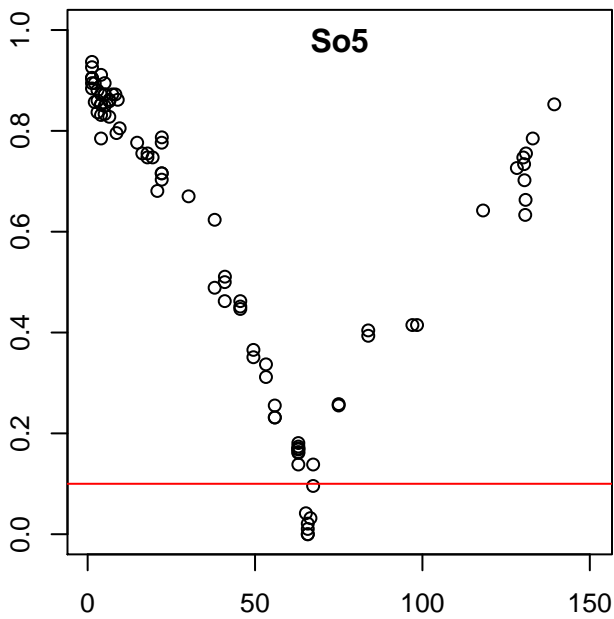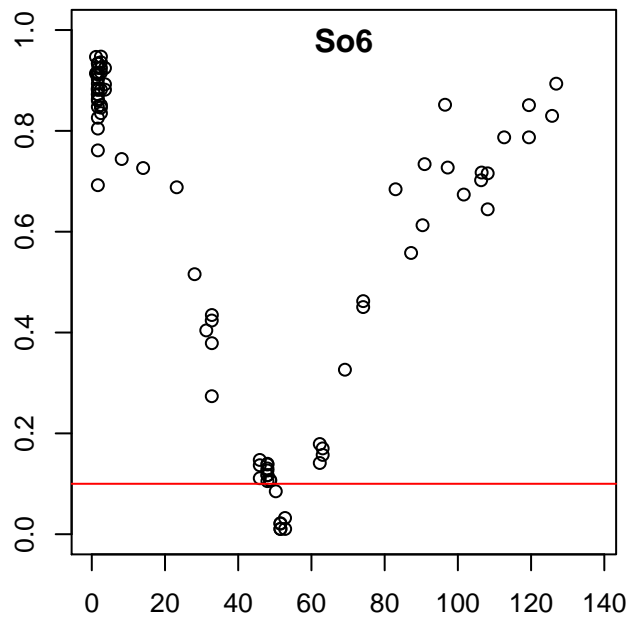

Heterozygosity

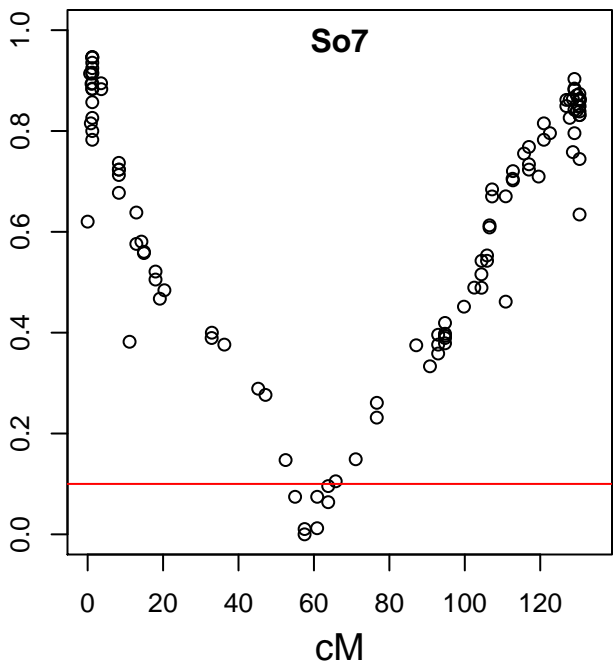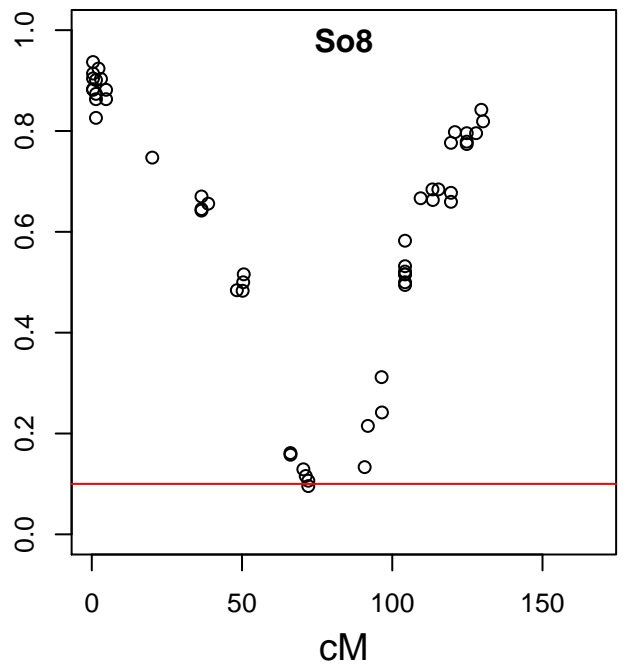

Heterozygosity

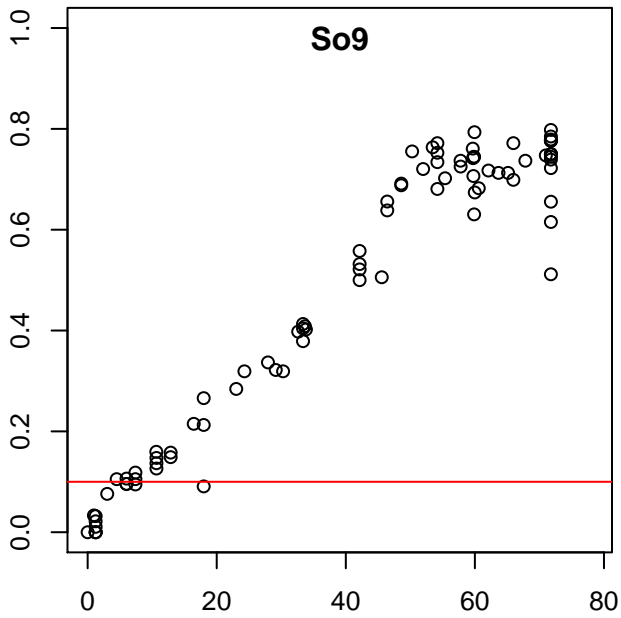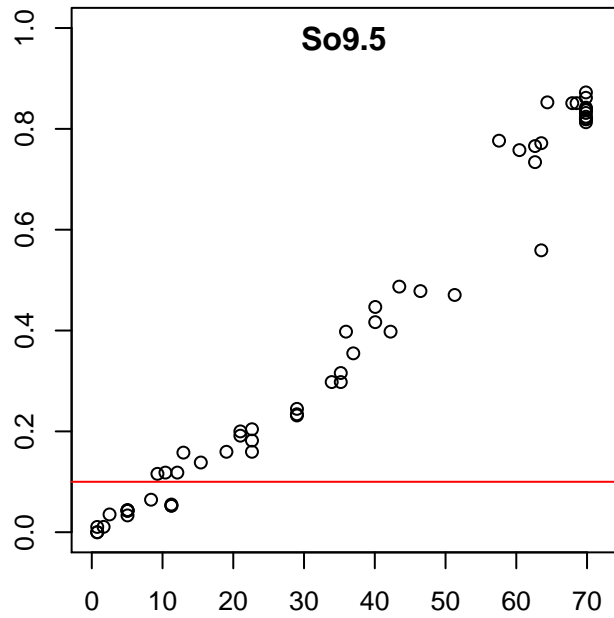

Heterozygosity

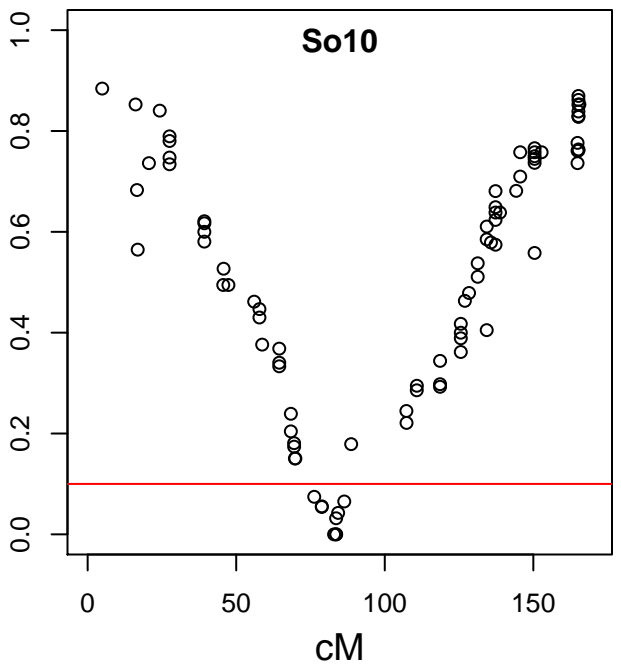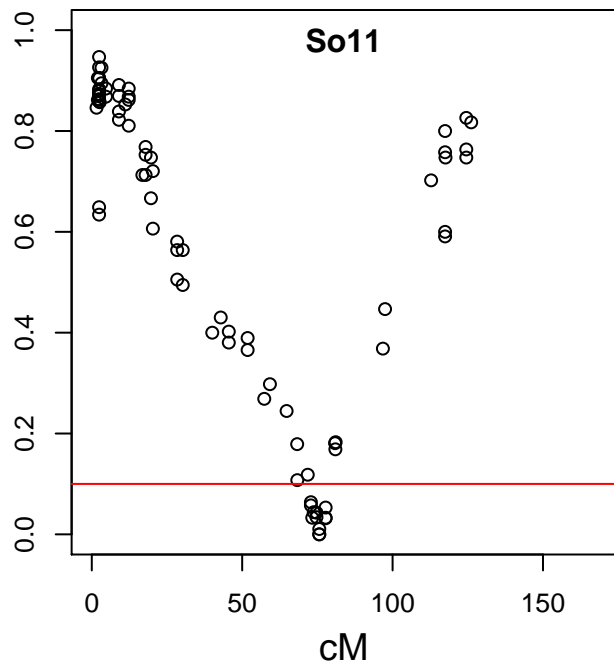

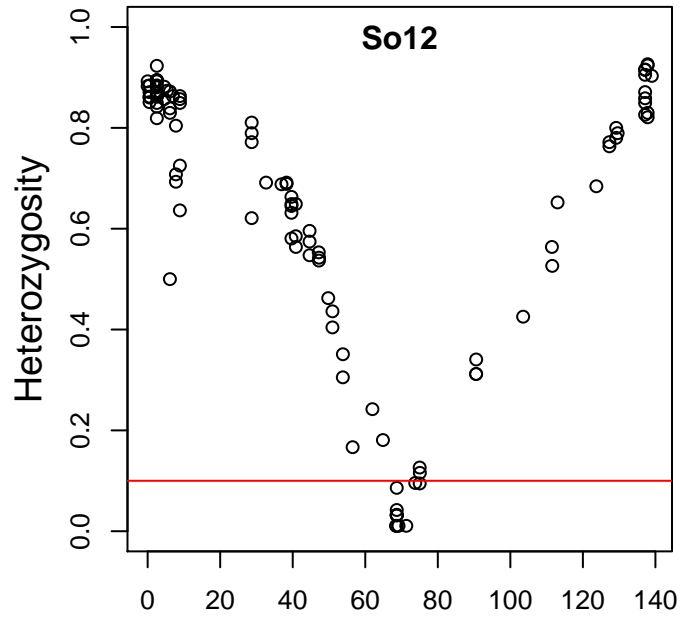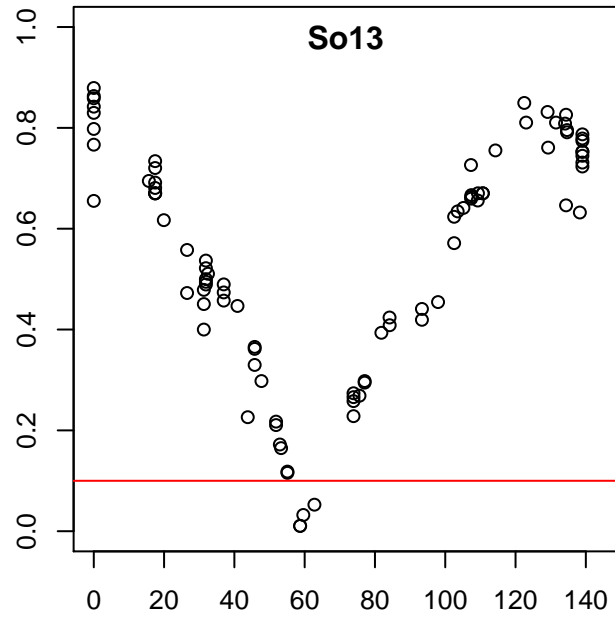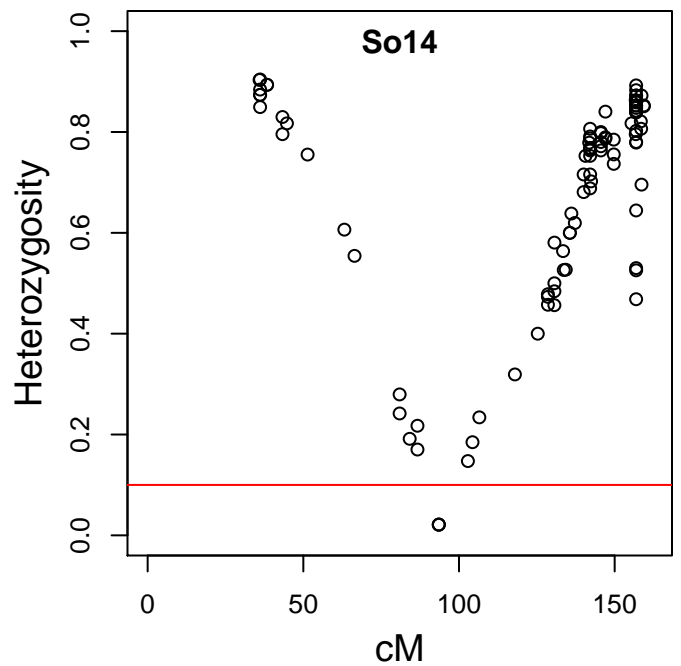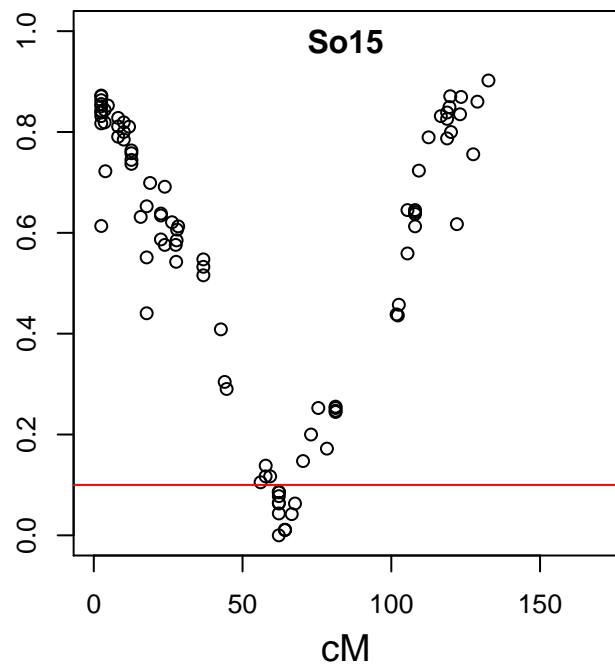

Heterozygosity

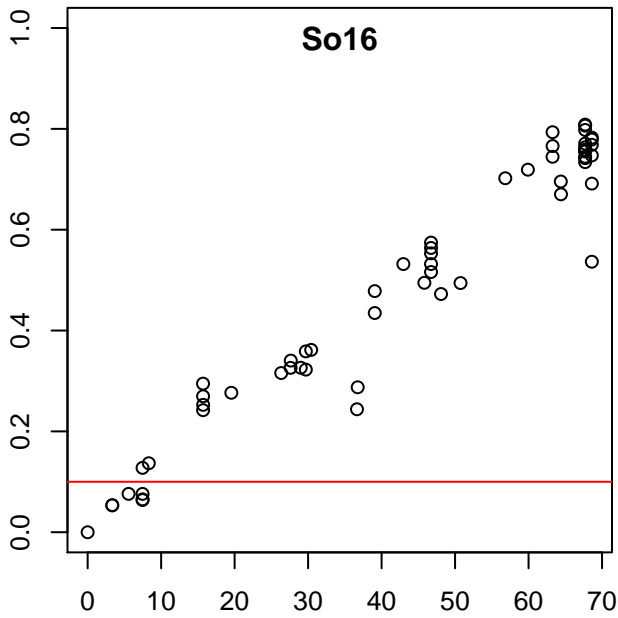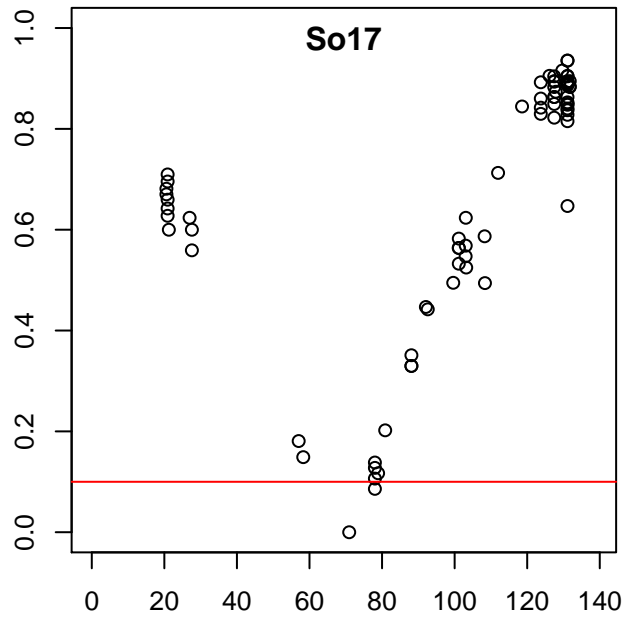

Heterozygosity

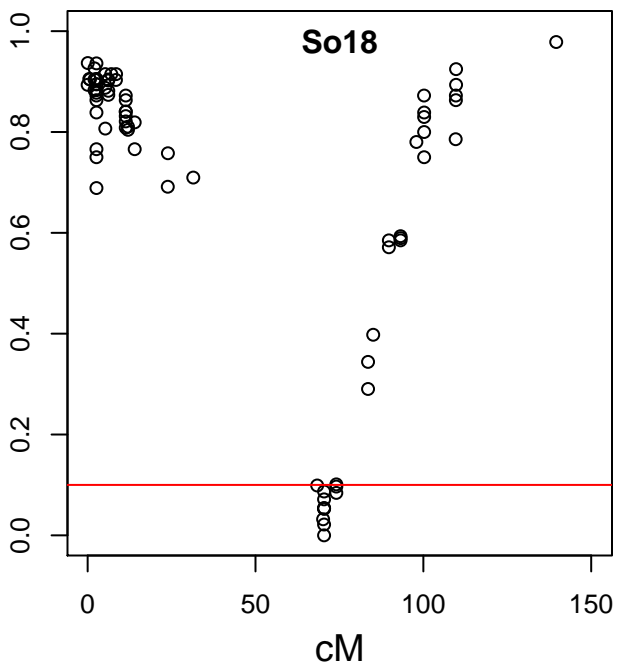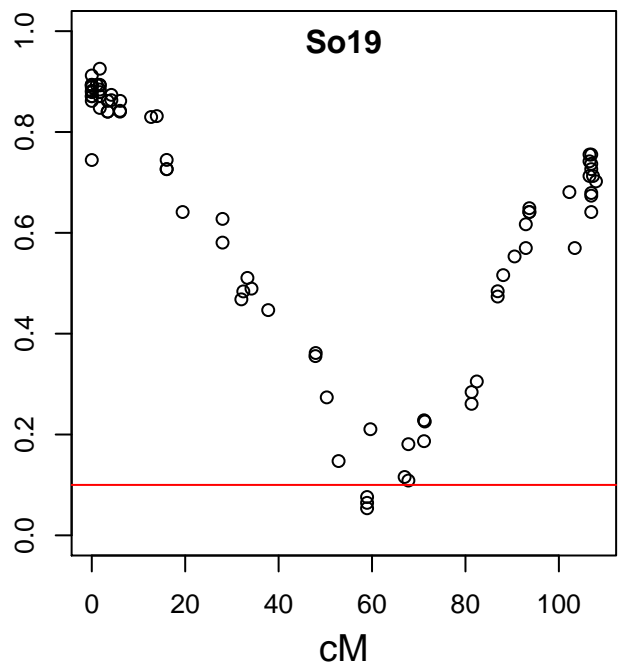

Heterozygosity

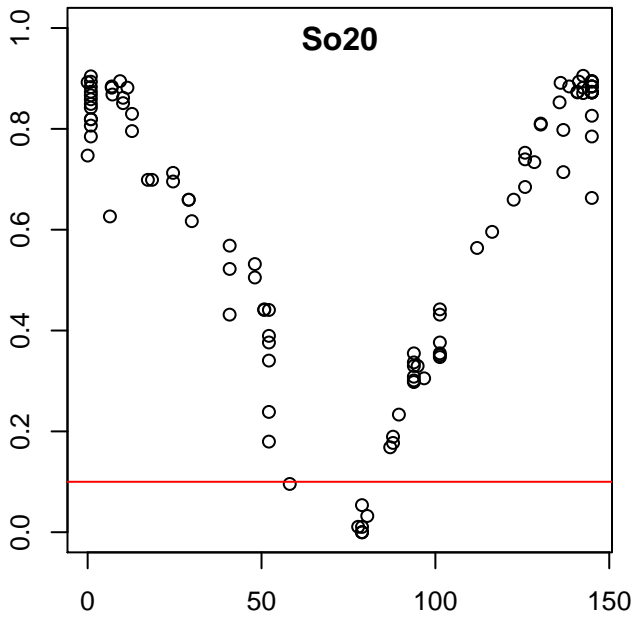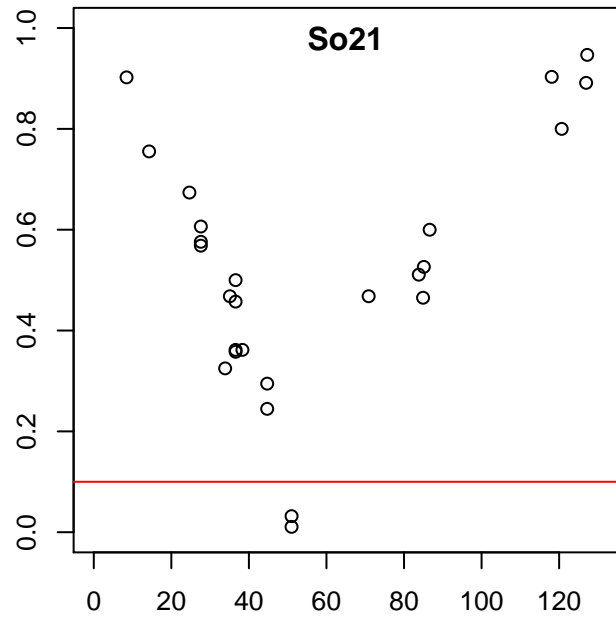

Heterozygosity

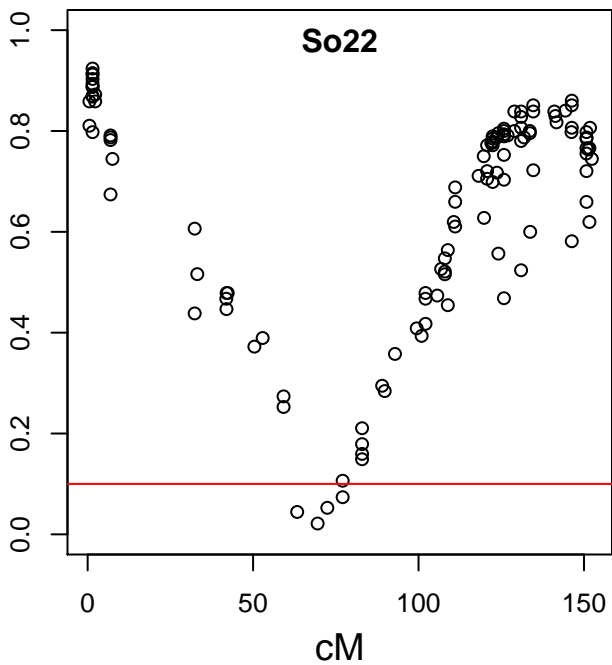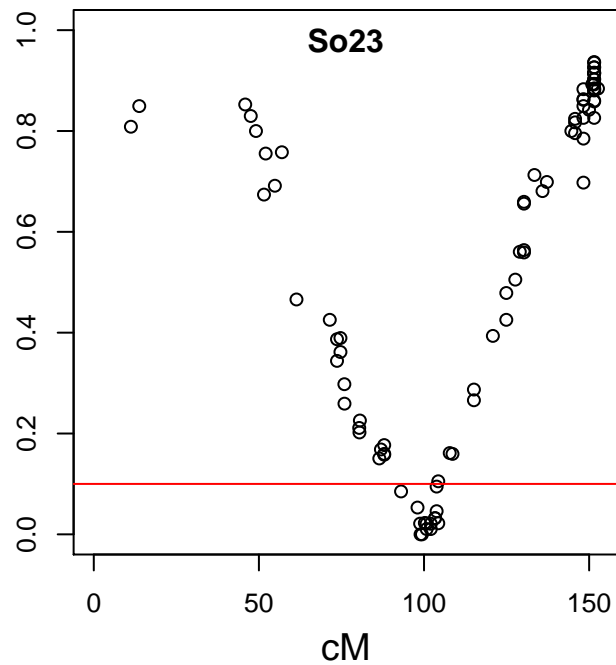

Heterozygosity

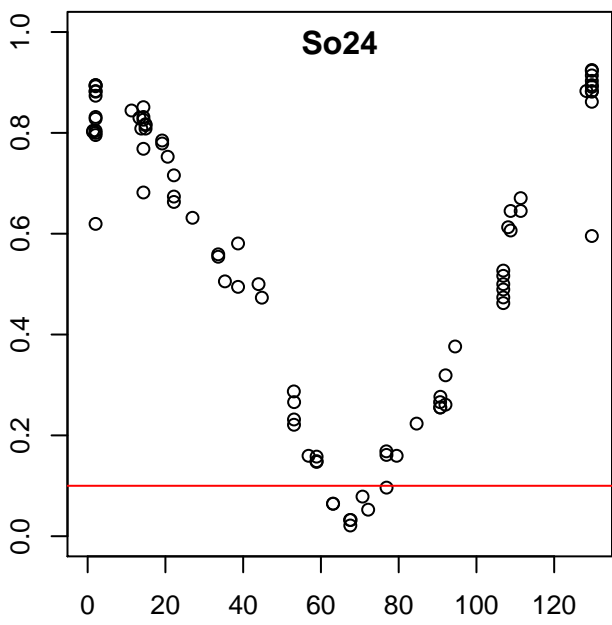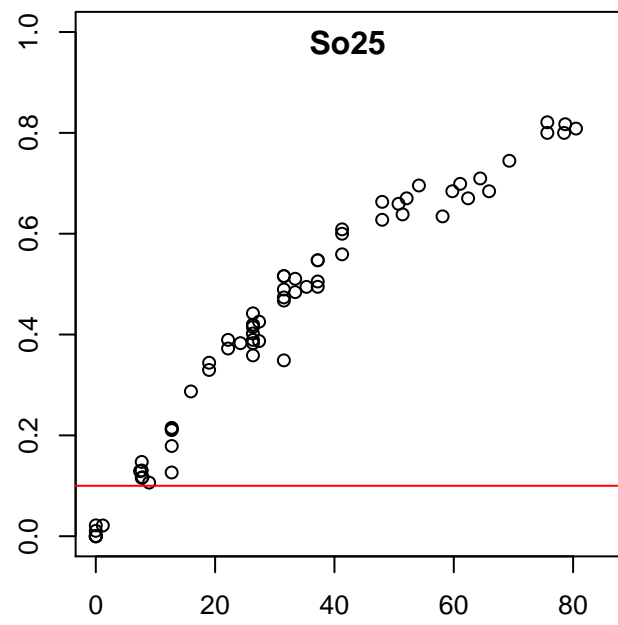

Heterozygosity

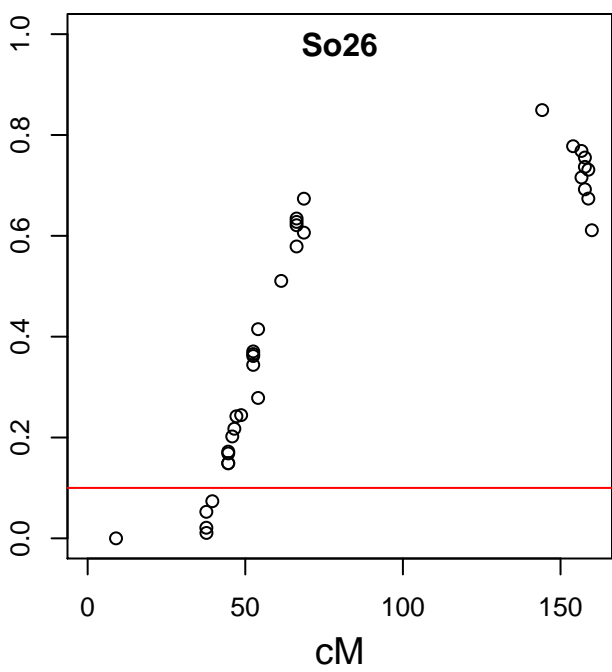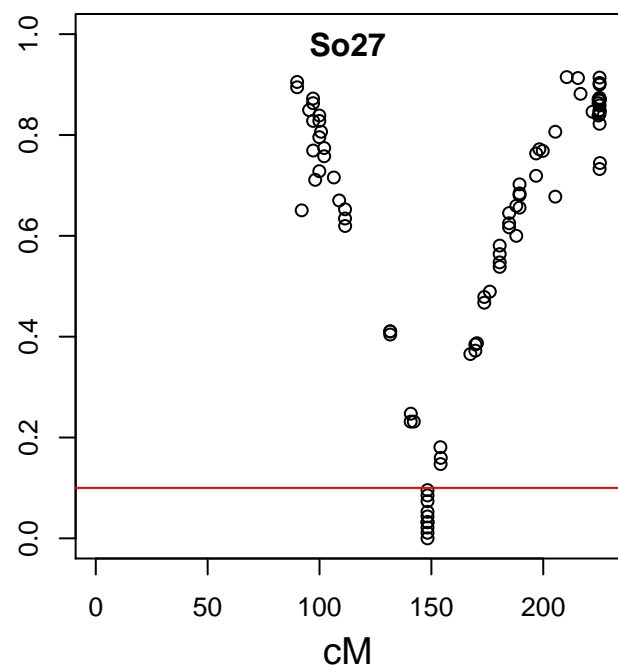

Heterozygosity

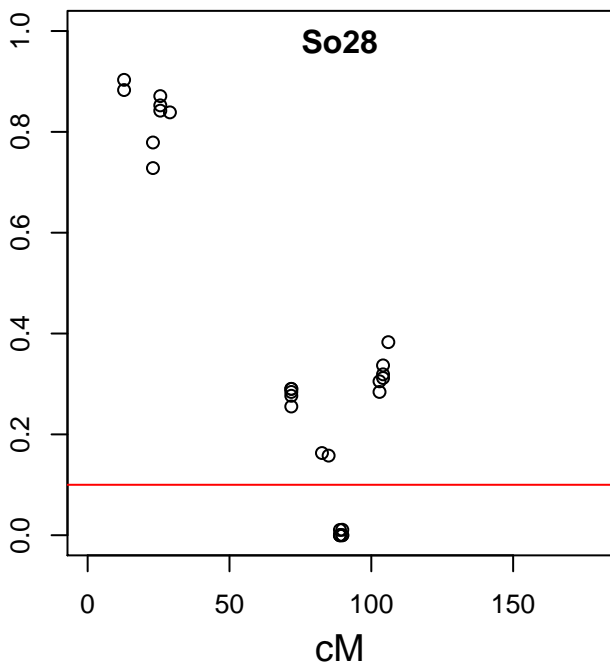

Supplement: esv099_suppl_supplementary_figure_s1.pdf [file esv099_suppl_supplementary_figure_s1.pdf]
