# Supplementary material
Source: PubMed Central journal article supplement (PMC5994969)

Thermotolerance

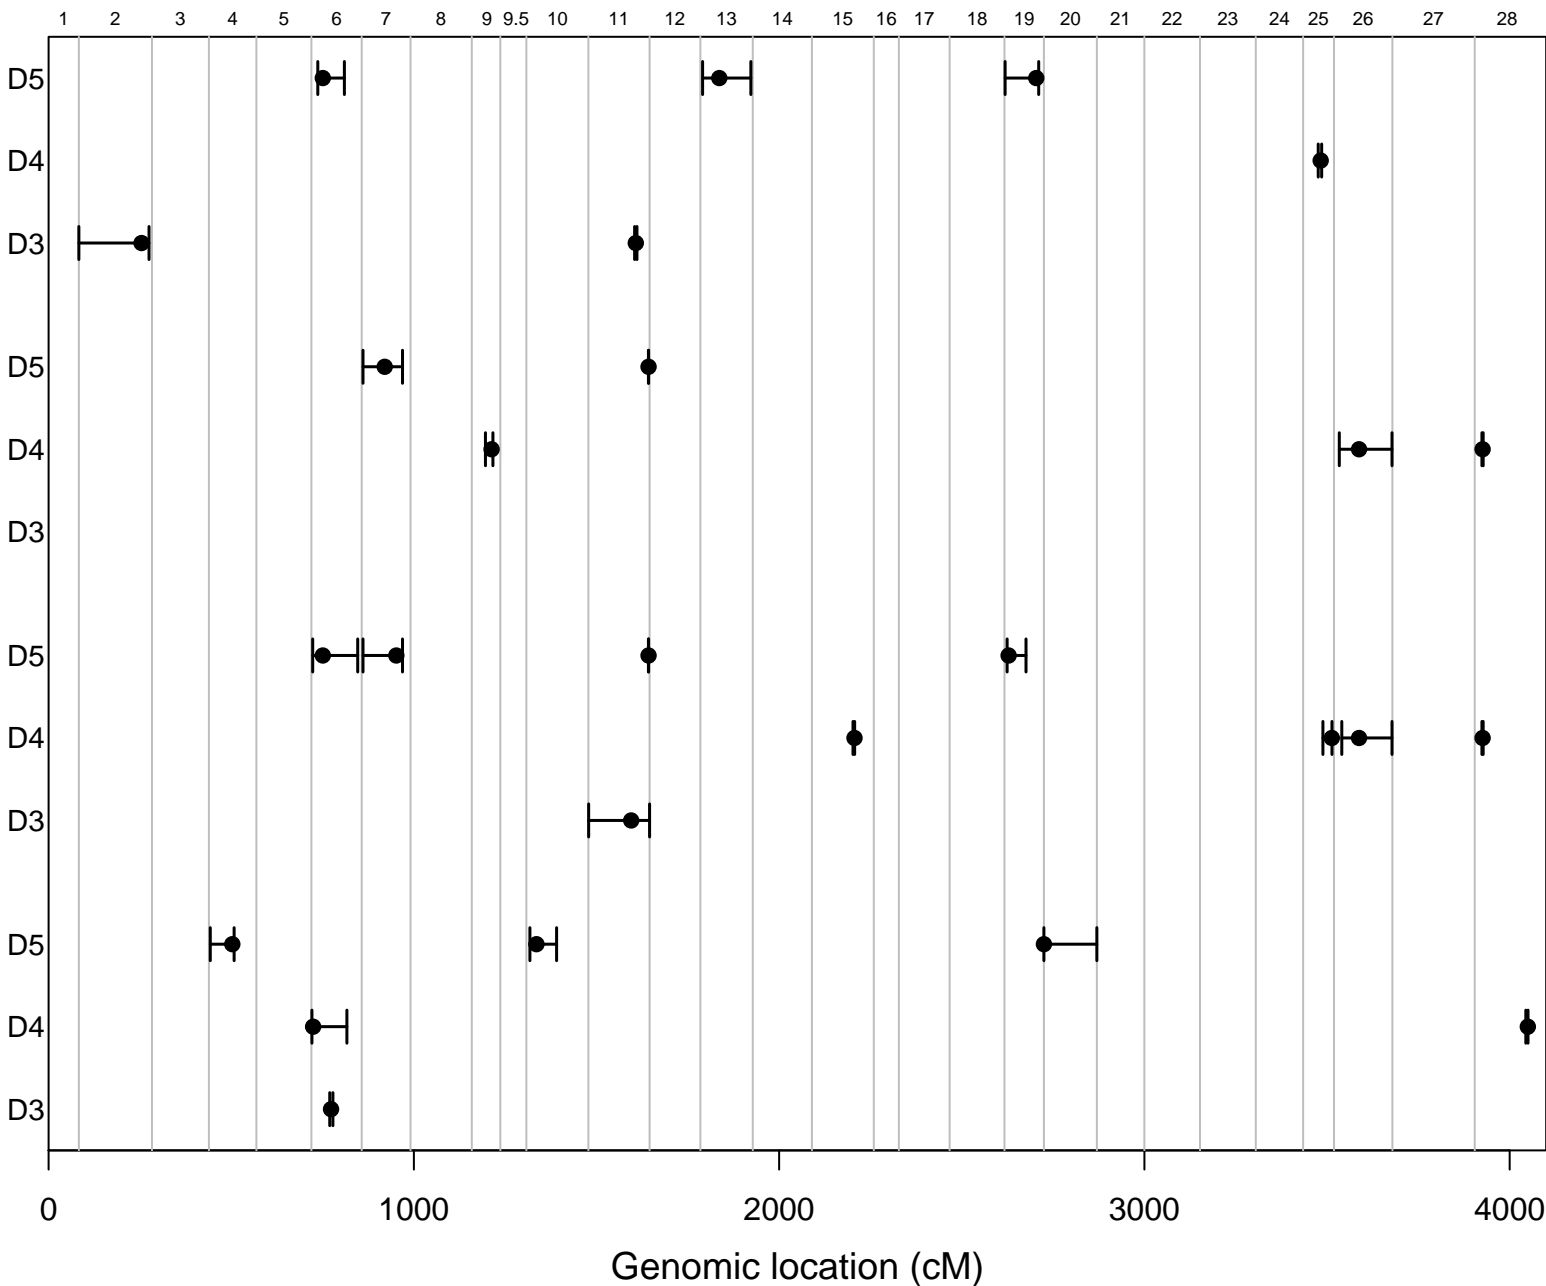

Supplement: supp_esv099_Larson_5_fig_s2_all_qtl.pdf [file supp_esv099_Larson_5_fig_s2_all_qtl.pdf]
